# Supplementary material for: Sensing nitrophenols and luminescent ink applications of sulfur quantum dots
Source: Royal Society of Chemistry journal article supplement (doi:10.1039/d3nj03447j), 2023-01-01
Supplement: d3nj03447j1.pdf [file d3nj03447j1.pdf]

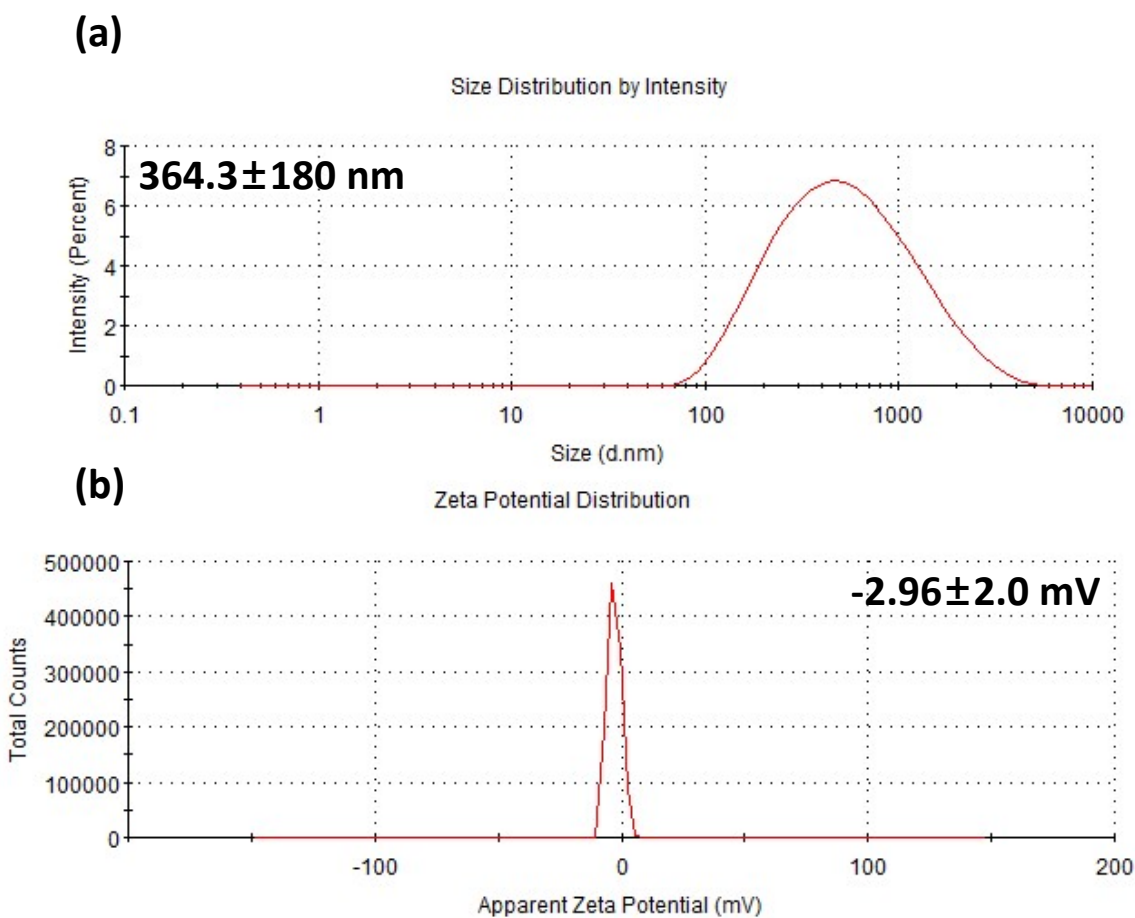

Figure S1 SQDs size distribution profile and zeta potential

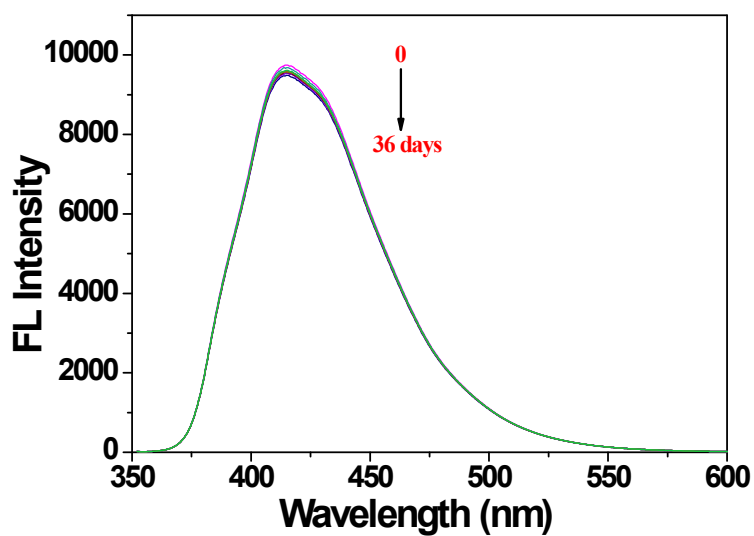

**Figure S2.** Emission changes of SQDs with an interval of 72 h for 36 days, after 9 months of preservation at 4 °C.

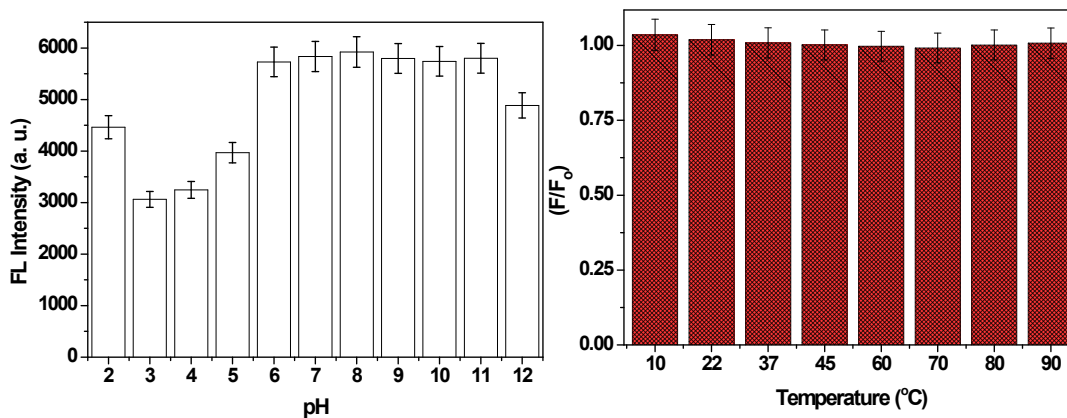

**Figure S3.** (a) Temperature and (b) pH influence on SQDs emission property.

**Table S1.** Comparison of SQDs LOD against 4-NP with the reported literature.

| Material             | Linear Rang( $\mu\text{M}$ ) | LOD( $\mu\text{M}$ ) | Ref.             |
|----------------------|------------------------------|----------------------|------------------|
| B, N-CDs             | 0.5-60,60-200                | 0.2                  | 1                |
| CDs-BC               | 0.3-6.5,6.5-30               | 0.11                 | 2                |
| Hollow nanospheres   | 0-34.9                       | 0.26                 | 3                |
| Au NCs               | 0.1-100                      | 0.09                 | 4                |
| Au NCs               | 1-50                         | 0.21                 | 5                |
| $\beta$ -CD-CdTe QDs | 20-100                       | 0.3                  | 6                |
| N-CDs                | 0.25-7.5                     | 0.05                 | 7                |
| N-CDs                | 0-250                        | 0.4                  | 8                |
| Cr-CDs               | 0.8-150                      | 0.27                 | 9                |
| B <sub>3</sub> N CDs | -                            | 0.17                 | 10               |
| SQDs                 | 0.2-30                       | 0.07                 | 11               |
| <b>SQDs</b>          | <b>0.12-50</b>               | <b>0.046</b>         | <b>This work</b> |

**Table S2.** Comparison of SQDs LOD against 4-NP with the reported literature.

| Material                              | Linear range( $\mu\text{M}$ ) | LOD( $\mu\text{M}$ ) | Ref.             |
|---------------------------------------|-------------------------------|----------------------|------------------|
| Cu,I pellet                           | 0-800                         | 2.30                 | 12               |
| Curcumin                              | 0.15-9.9                      | 0.079                | 13               |
| Si NPs                                | 0.1-500                       | 0.029                | 14               |
| N-CDs                                 | 0.001-1                       | 0.077                | 15               |
| Poly(propyleneimine-Au NPs)           | 0.61-625                      | 0.45                 | 16               |
| ZnCO <sub>2</sub> O <sub>4</sub> -GCE | 1-4000                        | 0.3                  | 17               |
| Polymethy red film                    | 0.1-40                        | 0.15                 | 18               |
| BaO nanorods                          | 1.5-9                         | 0.5                  | 19               |
| B-cyclodextrin                        | 5-400                         | 0.3                  | 20               |
| <b>SQDs</b>                           | <b>0.12-50</b>                | <b>0.171</b>         | <b>This work</b> |

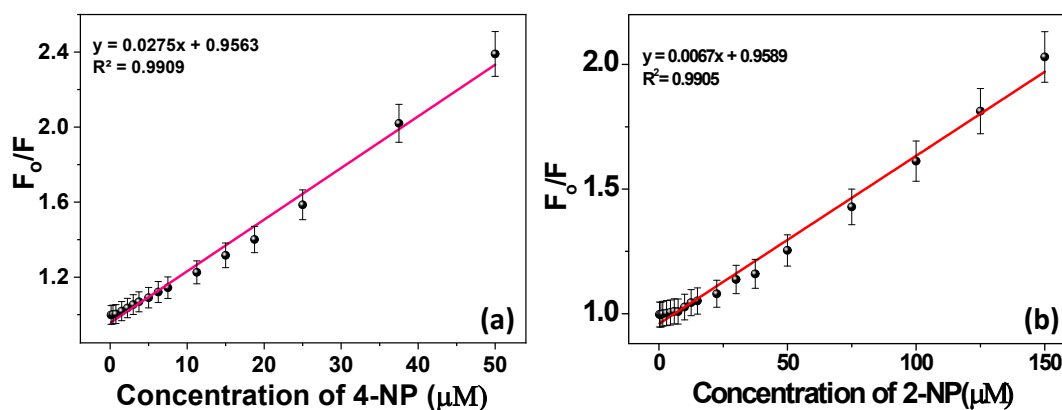

**Figure S4.** SQDs Stern-Volmer plots in the presence of nitrophenols: (a) 4-NP (b) 2-NP.

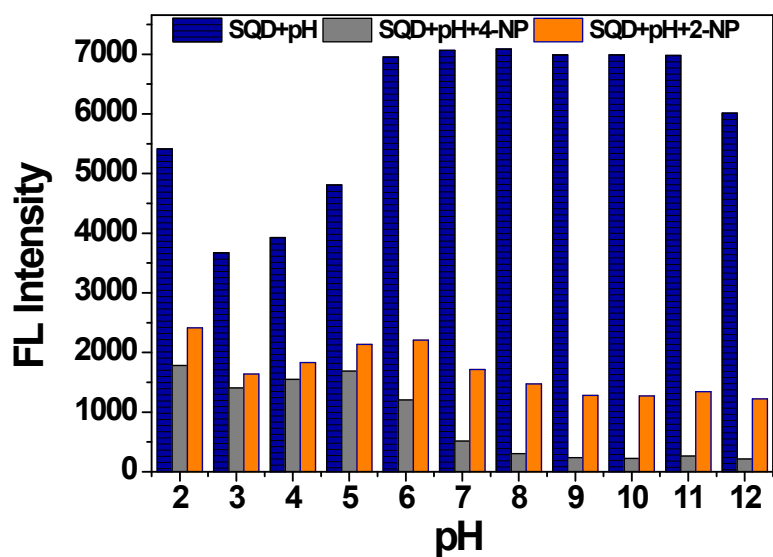

**Figure S5.** Influence of pH on emission and quenching property of SQDs in the presence of nitrophenols.

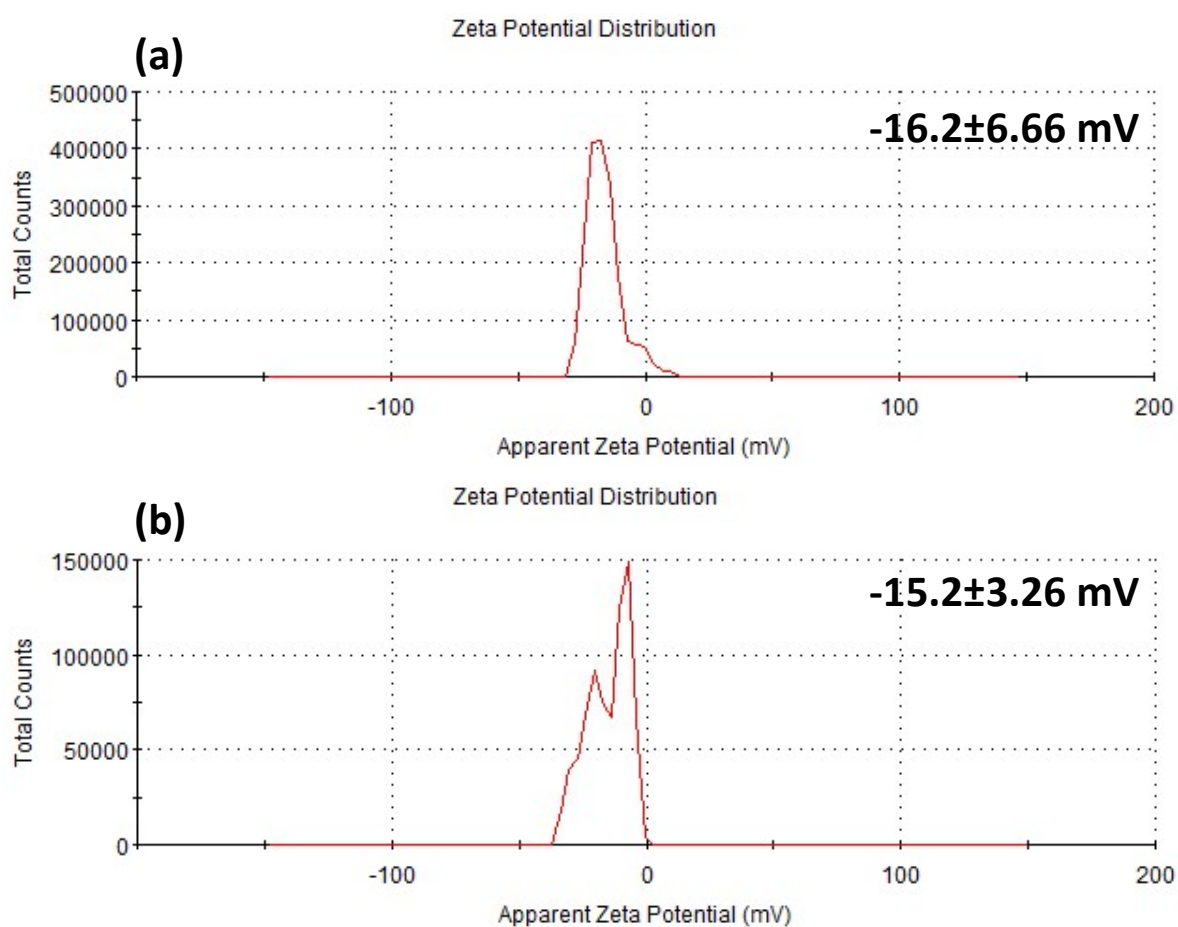

**Figure S6.** Zeta potential of SQDs in the presence of 4-NP(a) and 2-NP (b)

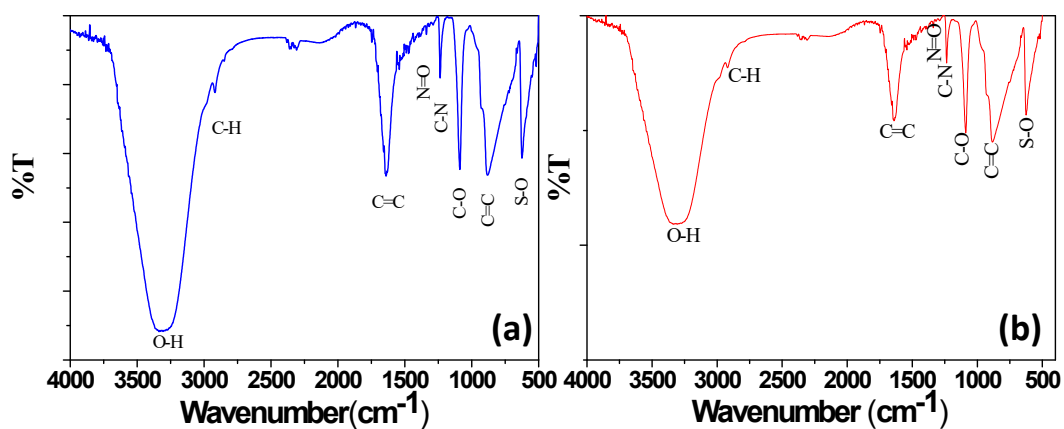

**Figure S7.** FT-IR spectra of SQDs in the presence of (a) 4-NP and (b) 2-NP

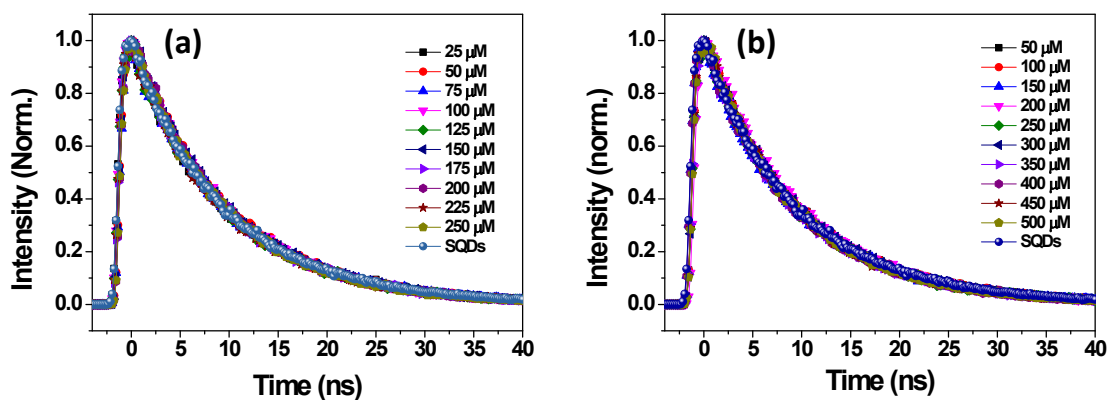

**Figure S8.** TRPL titration of SQDs in the presence of (a) 4-NP (25-250 μM) and (b) 2-NP (50-500 μM).

**Table S3.** Faster ( $\tau_1$  and  $\tau_2$ ), slower ( $\tau_3$ ) and average ( $\tau_{avg}$ ) decay values of SQDs in 4-NP solution

| 4-NP       | $\tau_1$ (ns) | $\tau_2$ (ns) | $\tau_3$ (ns) | $\tau_{avg}$ (ns) |
|------------|---------------|---------------|---------------|-------------------|
| SQDs       | 0.78          | 2.7           | 10.3          | 9.64              |
| SQDs+25 μM | 0.85          | 3.6           | 10.4          | 10.78             |
| SQDs+50 μM | 0.82          | 3.2           | 10.2          | 10.73             |

|                        |      |     |      |       |
|------------------------|------|-----|------|-------|
| SQDs+75 $\mu\text{M}$  | 0.14 | 4.5 | 10.3 | 9.80  |
| SQDs+100 $\mu\text{M}$ | 0.84 | 3.0 | 10.0 | 9.75  |
| SQDs+125 $\mu\text{M}$ | 0.89 | 3.8 | 10.1 | 10.30 |
| SQDs+150 $\mu\text{M}$ | 0.92 | 2.4 | 9.8  | 9.90  |
| SQDs+175 $\mu\text{M}$ | 0.25 | 3.7 | 10.0 | 9.59  |
| SQDs+200 $\mu\text{M}$ | 0.59 | 2.9 | 9.88 | 9.57  |
| SQDs+225 $\mu\text{M}$ | 0.12 | 2.1 | 97.9 | 9.82  |
| SQDs+250 $\mu\text{M}$ | 0.14 | 1.5 | 9.70 | 9.78  |

**Table S4.** Faster ( $\tau_1$  and  $\tau_2$ ), slower ( $\tau_3$ ) and average ( $\tau_{\text{avg}}$ ) decay values of SQDs in 2-NP solution

| <b>2-NP</b>            | <b><math>\tau_1(\text{ns})</math></b> | <b><math>\tau_2(\text{ns})</math></b> | <b><math>\tau_3(\text{ns})</math></b> | <b><math>\tau_{\text{avg}}(\text{ns})</math></b> |
|------------------------|---------------------------------------|---------------------------------------|---------------------------------------|--------------------------------------------------|
| SQDs                   | 0.78                                  | 2.7                                   | 10.3                                  | 9.64                                             |
| SQDs+50 $\mu\text{M}$  | 0.96                                  | 4.6                                   | 10.3                                  | 9.84                                             |
| SQDs+100 $\mu\text{M}$ | 0.36                                  | 3.3                                   | 10.1                                  | 9.75                                             |
| SQDs+150 $\mu\text{M}$ | 0.143                                 | 3.5                                   | 10.2                                  | 9.72                                             |
| SQDs+200 $\mu\text{M}$ | 0.84                                  | 3.2                                   | 10.0                                  | 9.75                                             |
| SQDs+250 $\mu\text{M}$ | 0.93                                  | 4.0                                   | 10.1                                  | 9.67                                             |
| SQDs+300 $\mu\text{M}$ | 0.44                                  | 3.8                                   | 10.0                                  | 9.64                                             |
| SQDs+350 $\mu\text{M}$ | 0.24                                  | 2.9                                   | 98.7                                  | 9.57                                             |
| SQDs+400 $\mu\text{M}$ | 0.36                                  | 3.6                                   | 98.0                                  | 9.38                                             |
| SQDs+450 $\mu\text{M}$ | 0.15                                  | 4.6                                   | 98.3                                  | 9.33                                             |
| SQDs+500 $\mu\text{M}$ | 0.11                                  | 3.8                                   | 98.0                                  | 9.37                                             |

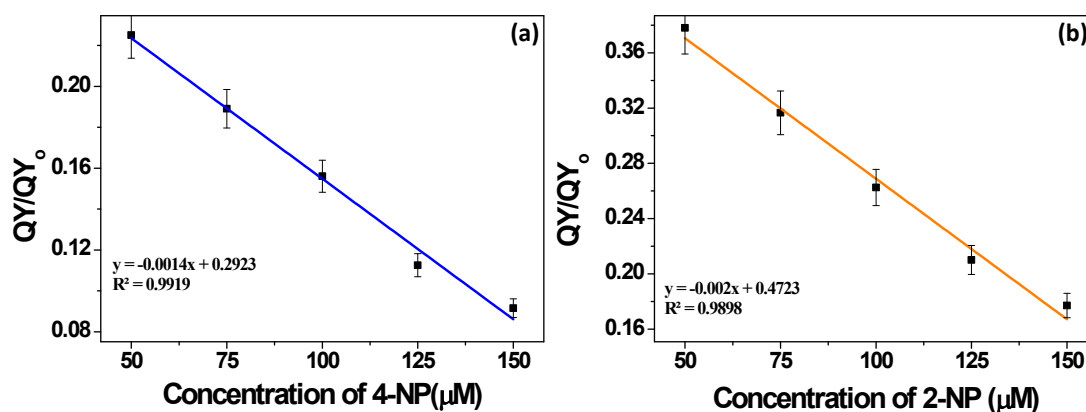

**Figure S9.** Influence of nitrophenols on SQDs PLQY (a) SQDs+4-NP (b) SQDs+2-NP.

- 1 N. Xiao, S. G. Liu, S. Mo, N. Li, Y. J. Ju, Y. Ling, N. B. Li and H. Q. Luo, *Talanta*, 2018, **184**, 184–192.
- 2 S. Zhang, D. Zhang, Y. Ding, J. Hua, B. Tang, X. Ji, Q. Zhang, Y. Wei, K. Qin and B. Li, *Analyst*, 2019, **144**, 5497–5503.
- 3 S. Jiang, S. Liu, L. Meng, Q. Qi, L. Wang, B. Xu, J. Liu and W. Tian, *Sci. China Chem.*, 2020, **63**, 497–503.
- 4 Y. Li, Q. L. Wen, A. Y. Liu, Y. Long, P. Liu, J. Ling, Z. T. Ding and Q. E. Cao, *Microchim. Acta*, 2020, **187**, 1–9.
- 5 H. Yang, F. Lu, Y. Sun, Z. Yuan and C. Lu, *Anal. Chem.*, 2018, **90**, 12846–12853.
- 6 Z. Zhang, J. Zhou, Y. Liu, J. Tang and W. Tang, *Nanoscale*, 2015, **7**, 19540–19546.
- 7 S. K. Tammina and Y. Yang, *J. Photochem. Photobiol. A Chem.*, , DOI:10.1016/j.jphotochem.2019.112134.
- 8 D. Das and R. K. Dutta, 2023, **06**, 47.

- 9 C. Li, Y. Zheng, H. Ding, H. Jiang and X. Wang, *Microchim. Acta*, 2019, **186**, 1–8.
- 10 S. Tummala, C. H. Lee and Y. P. Ho, *Nanotechnology*, 2021, **32**, 265502.
- 11 X. Peng, Y. Wang, Z. Luo, B. Zhang, X. Mei and X. Yang, *Microchem. J.*, 2021, **170**, 106735.
- 12 G. N. Liu, R. D. Xu, R. Y. Zhao, Y. Sun, Q. B. Bo, Z. Y. Duan, Y. H. Li, Y. Y. Wang, Q. Wu and C. Li, *ACS Sustain. Chem. Eng.*, 2019, **7**, 18863–18873.
- 13 Y. Wang, K. M. Wang, G. L. Shen and R. Q. Yu, *Talanta*, 1997, **44**, 1319–1327.
- 14 Y. Han, Y. Chen, J. Feng, M. Na, J. Liu, Y. Ma, S. Ma and X. Chen, *Talanta*, 2019, **194**, 822–829.
- 15 Y. Qu, G. Ren, L. Yu, B. Zhu, F. Chai and L. Chen, *J. Lumin.*, 2019, **207**, 589–596.
- 16 T. Ndlovu, O. A. Arotiba, R. W. Krause and B. B. Mamba, *Int. J. Electrochem. Sci.*, 2010, **5**, 1179–1186.
- 17 J. Zhang, S. Cui, Y. Ding, X. Yang, K. Guo and J. T. Zhao, *Biosens. Bioelectron.*, 2018, **112**, 177–185.
- 18 W. A. Adeosun, A. M. Asiri and H. M. Marwani, *Synth. Met.*, 2020, **261**, 116321.
- 19 M. M. Alam, A. M. Asiri and M. M. Rahman, *Chem. – An Asian J.*, 2021, **16**, 1475–1485.
- 20 J. Liu, Y. Chen, Y. Guo, F. Yang and F. Cheng, *J. Nanomater.*, , DOI:10.1155/2013/632809.
